# Supplementary material for: Advanced backcross QTL analysis and comparative mapping with RIL QTL studies and GWAS provide an overview of QTL and marker haplotype diversity for resistance to Aphanomyces root rot in pea (Pisum sativum)
Source: PubMed Central journal article supplement (PMC10569610; doi:10.3389/fpls.2023.1189289), 2023-09-28

**A****Eden x E11**Controlled conditions  
Strain RB84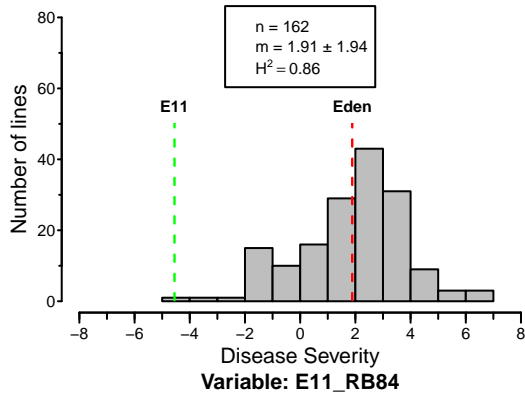**B****Eden x LISA**

Number of lines

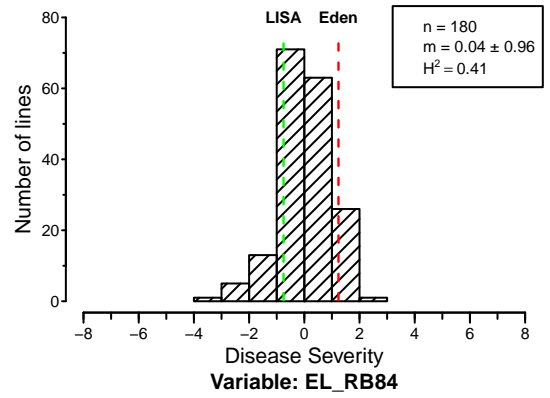Controlled conditions  
Strain Ae109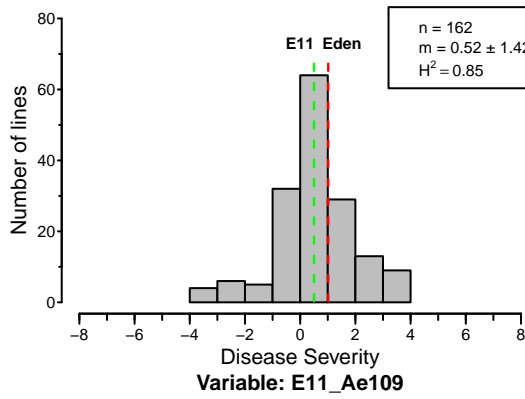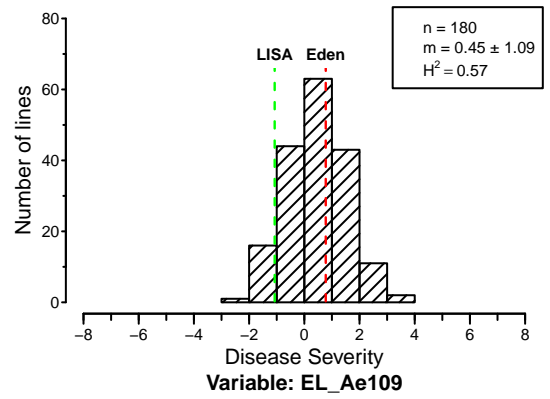Field  
Riec RRI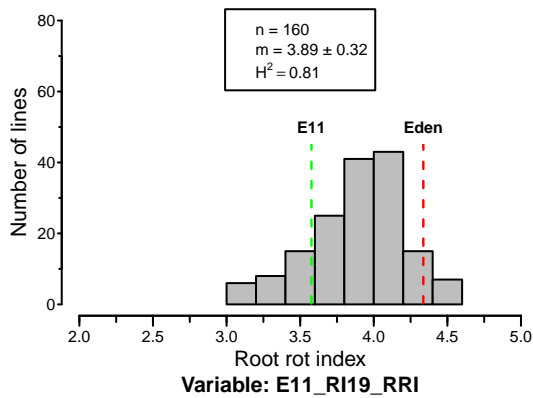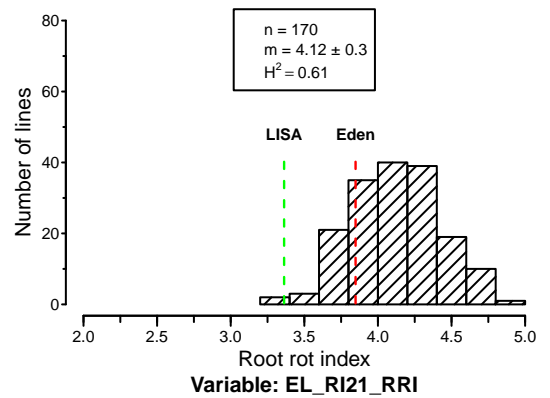Field  
Riec ADI1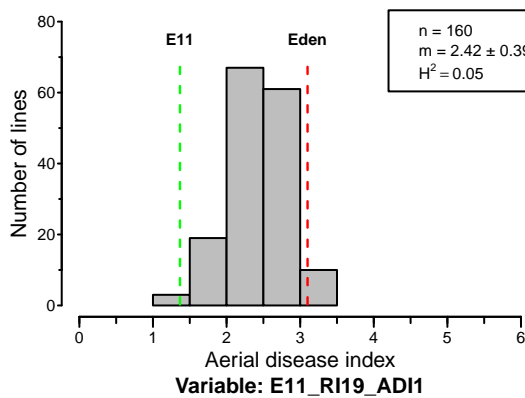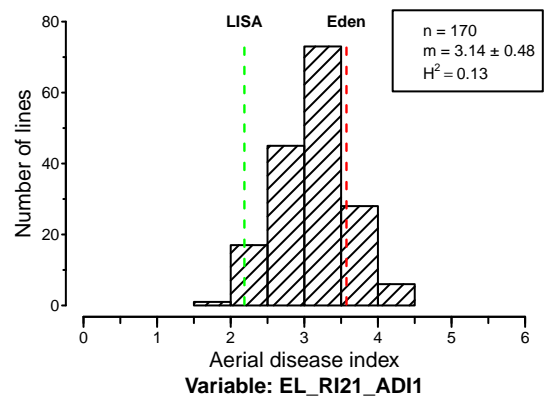

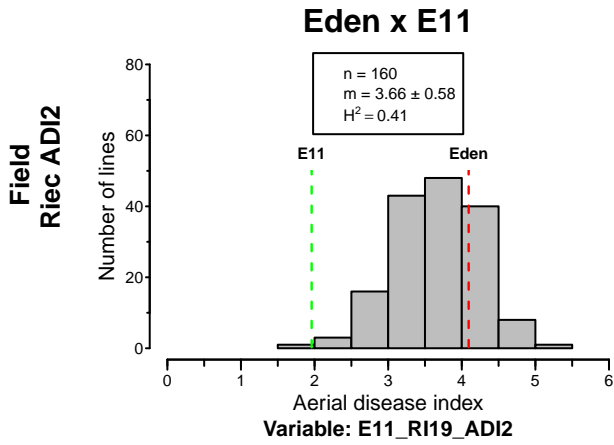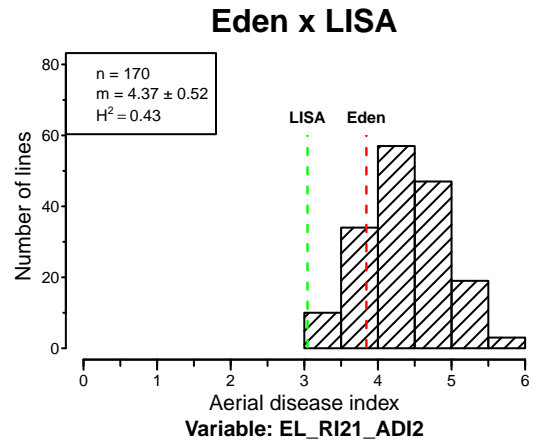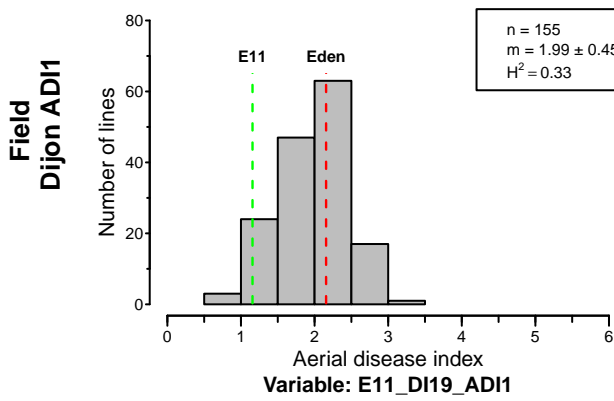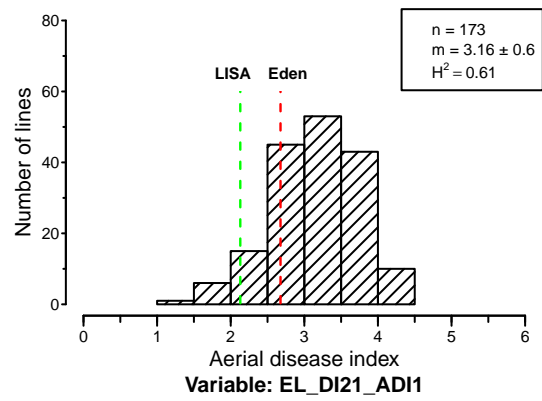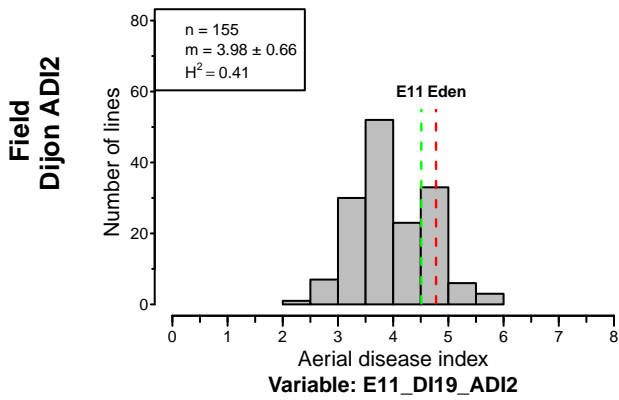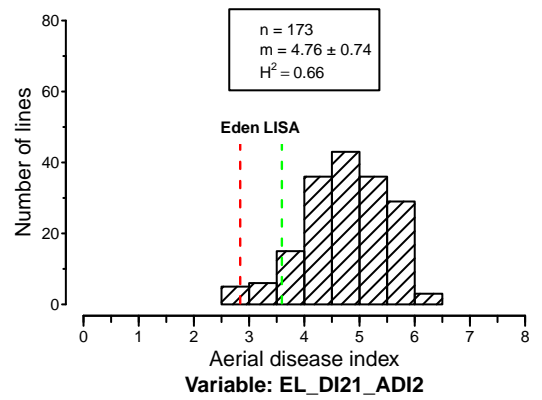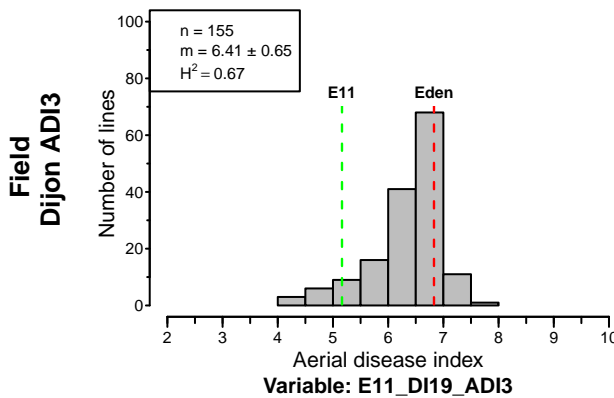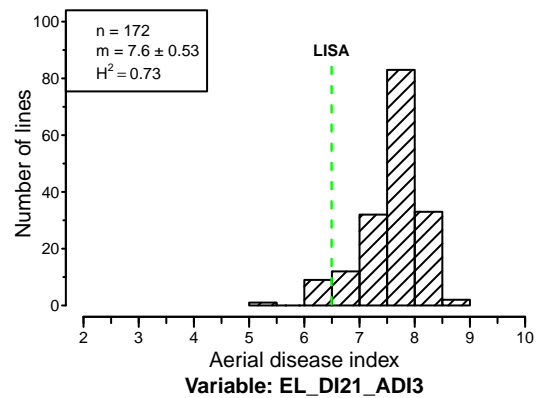

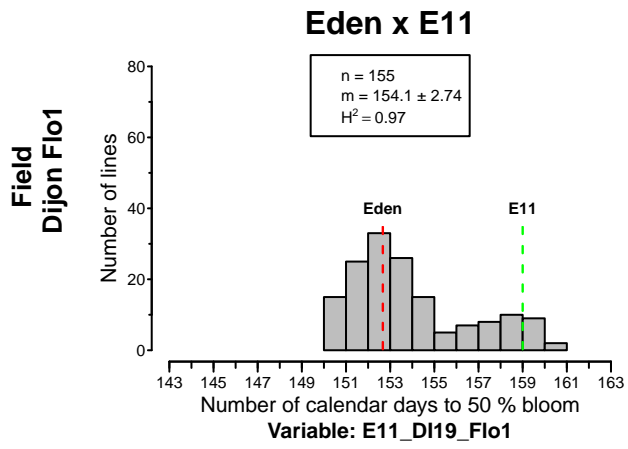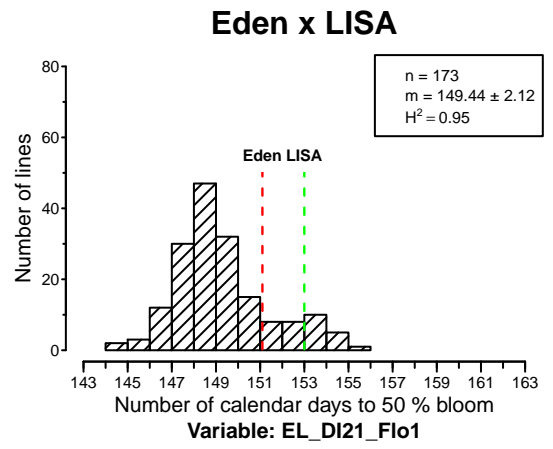

Supplement: DataSheet_1.pdf [file DataSheet_1.pdf]
