# Supplementary material for: Advanced backcross QTL analysis and comparative mapping with RIL QTL studies and GWAS provide an overview of QTL and marker haplotype diversity for resistance to Aphanomyces root rot in pea (Pisum sativum)
Source: PubMed Central journal article supplement (PMC10569610; doi:10.3389/fpls.2023.1189289), 2023-09-28
Supplement: DataSheet_2.pdf [file DataSheet_2.pdf]

**A**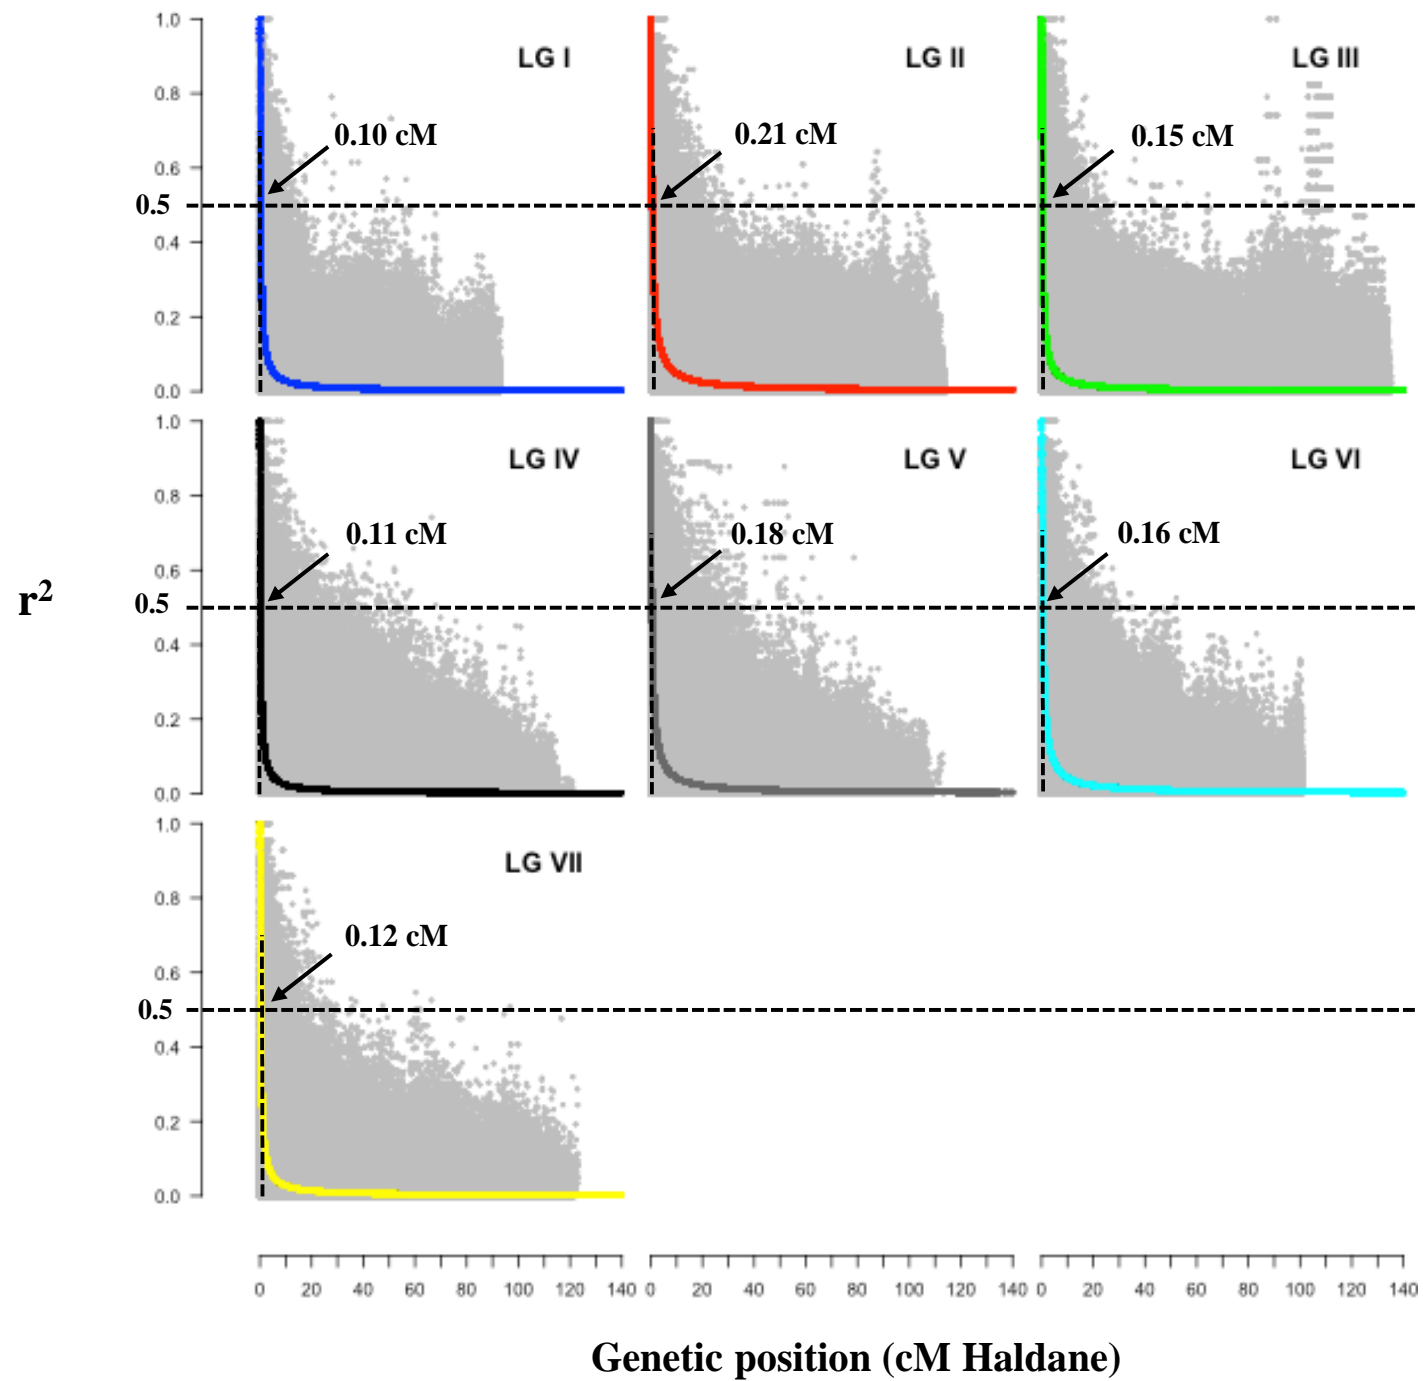

# B

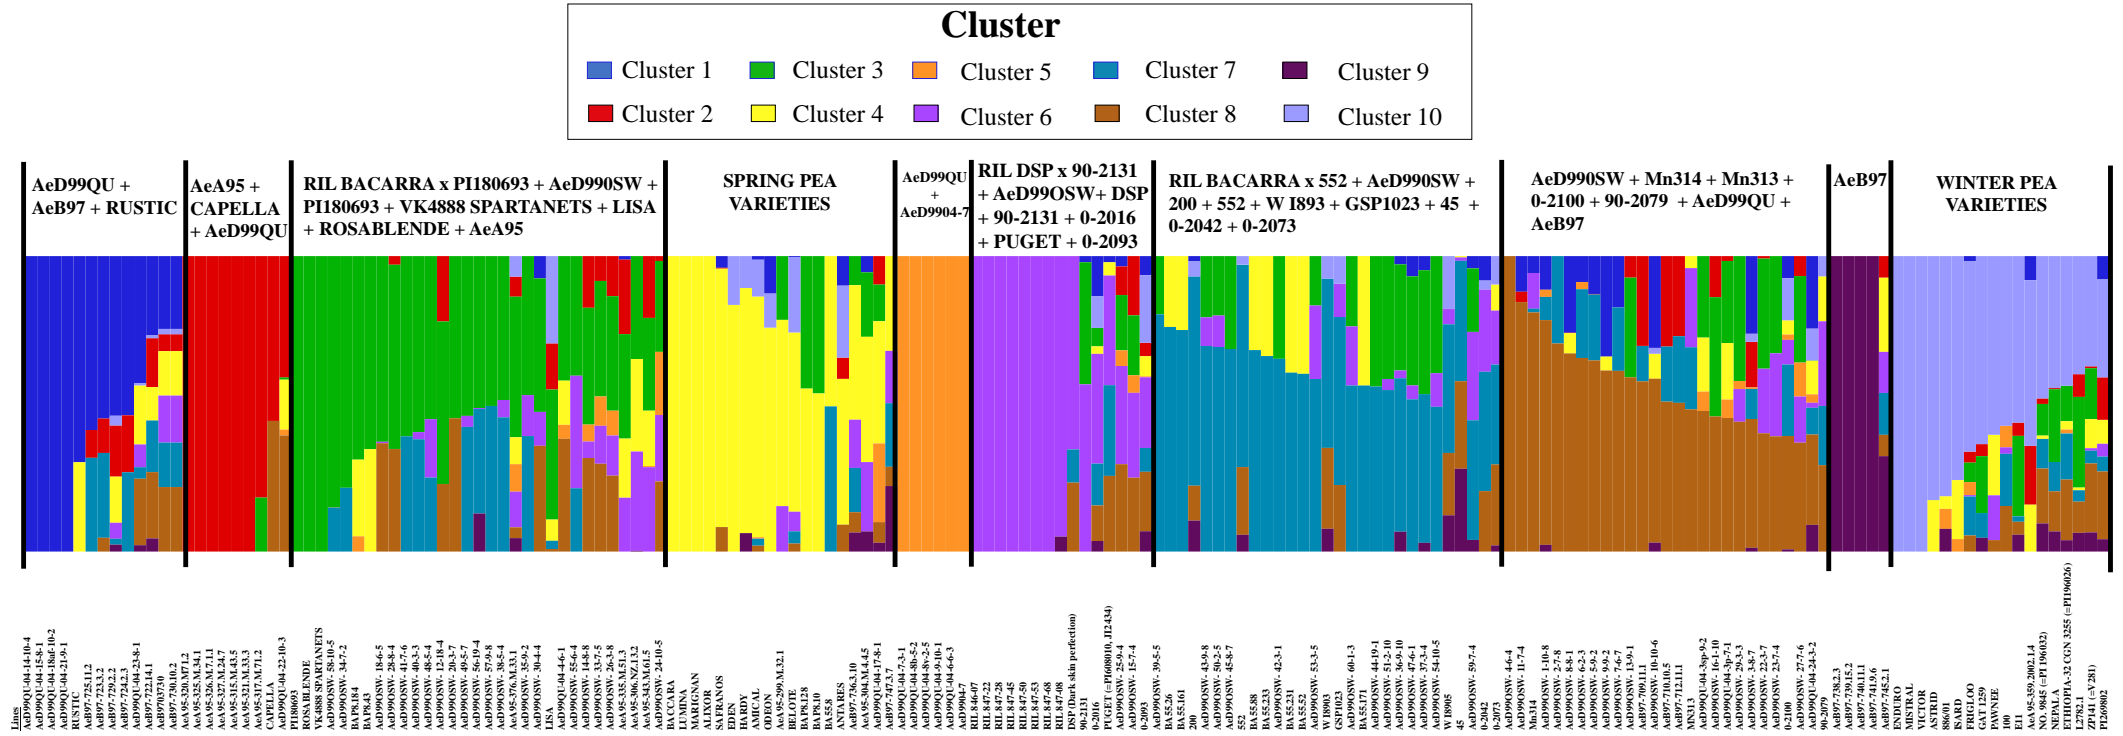

C

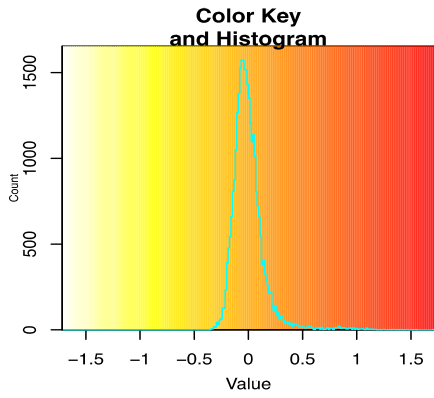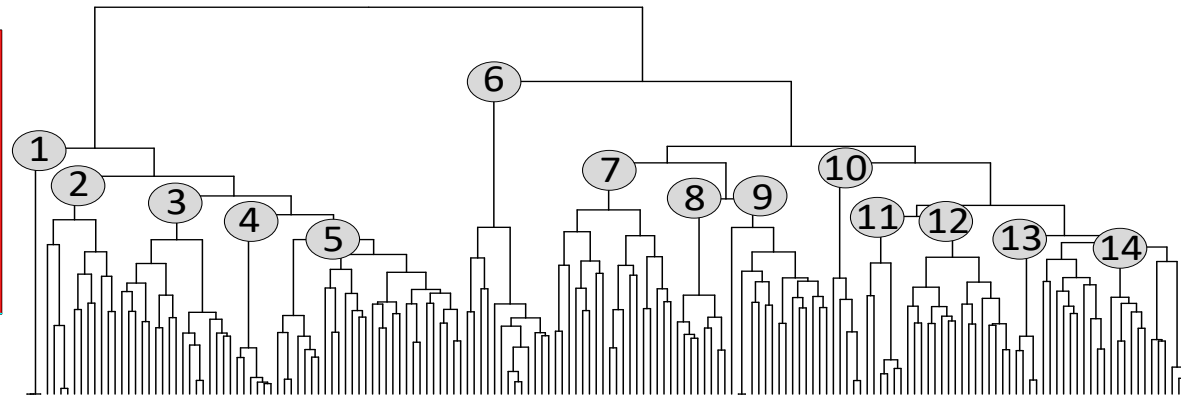

- 1 PII180693 + VK4888 SPARTANETS + ROSABLENDE
- 2 RIL BACCARA x PII180693 + AeD99QU + LISA + AeA95
- 3 RIL DSP x 90-2131 + 90-2131 + AeD99OSW + AeA95
- 4 AeD99QU + AeD9904-7
- 5 AeA95 + AeD99OSW
- 6 SPRING PEA VARIETIES
- 7 WINTER PEA VARIETIES + E11
- 8 RIL BACCARA x 552
- 9 AeB97 + AeD99QU + AeD99OSW + RUSTIC
- 10 AeB97 + AeD99QU + CAPELLA
- 11 AeB97
- 12 AeD99OSW
- 13 AeD99QU
- 14 AeD99OSW + AeB97 + 0- + Mn + DSP + PUGET + 45 + W 18 + GSP1023 + 200 + 90-2079 + 552

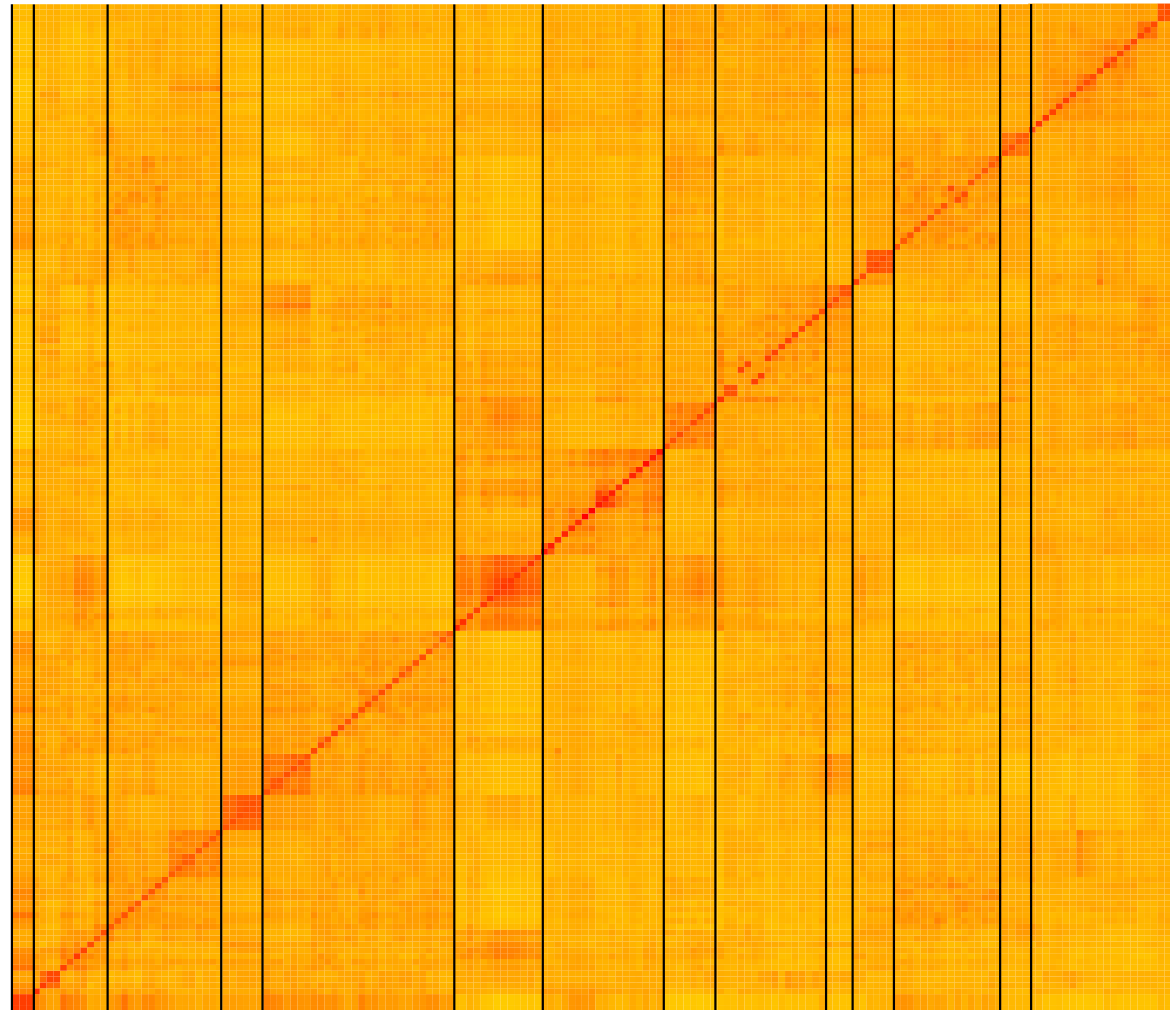

ARI101  
 ARI102  
 ARI103  
 ARI104  
 ARI105  
 ARI106  
 ARI107  
 ARI108  
 ARI109  
 ARI110  
 ARI111  
 ARI112  
 ARI113  
 ARI114  
 ARI115  
 ARI116  
 ARI117  
 ARI118  
 ARI119  
 ARI120  
 ARI121  
 ARI122  
 ARI123  
 ARI124  
 ARI125  
 ARI126  
 ARI127  
 ARI128  
 ARI129  
 ARI130  
 ARI131  
 ARI132  
 ARI133  
 ARI134  
 ARI135  
 ARI136  
 ARI137  
 ARI138  
 ARI139  
 ARI140  
 ARI141  
 ARI142  
 ARI143  
 ARI144  
 ARI145  
 ARI146  
 ARI147  
 ARI148  
 ARI149  
 ARI150  
 ARI151  
 ARI152  
 ARI153  
 ARI154  
 ARI155  
 ARI156  
 ARI157  
 ARI158  
 ARI159  
 ARI160  
 ARI161  
 ARI162  
 ARI163  
 ARI164  
 ARI165  
 ARI166  
 ARI167  
 ARI168  
 ARI169  
 ARI170  
 ARI171  
 ARI172  
 ARI173  
 ARI174  
 ARI175  
 ARI176  
 ARI177  
 ARI178  
 ARI179  
 ARI180  
 ARI181  
 ARI182  
 ARI183  
 ARI184  
 ARI185  
 ARI186  
 ARI187  
 ARI188  
 ARI189  
 ARI190  
 ARI191  
 ARI192  
 ARI193  
 ARI194  
 ARI195  
 ARI196  
 ARI197  
 ARI198  
 ARI199  
 ARI200  
 ARI201  
 ARI202  
 ARI203  
 ARI204  
 ARI205  
 ARI206  
 ARI207  
 ARI208  
 ARI209  
 ARI210  
 ARI211  
 ARI212  
 ARI213  
 ARI214  
 ARI215  
 ARI216  
 ARI217  
 ARI218  
 ARI219  
 ARI220  
 ARI221  
 ARI222  
 ARI223  
 ARI224  
 ARI225  
 ARI226  
 ARI227  
 ARI228  
 ARI229  
 ARI230  
 ARI231  
 ARI232  
 ARI233  
 ARI234  
 ARI235  
 ARI236  
 ARI237  
 ARI238  
 ARI239  
 ARI240  
 ARI241  
 ARI242  
 ARI243  
 ARI244  
 ARI245  
 ARI246  
 ARI247  
 ARI248  
 ARI249  
 ARI250  
 ARI251  
 ARI252  
 ARI253  
 ARI254  
 ARI255  
 ARI256  
 ARI257  
 ARI258  
 ARI259  
 ARI260  
 ARI261  
 ARI262  
 ARI263  
 ARI264  
 ARI265  
 ARI266  
 ARI267  
 ARI268  
 ARI269  
 ARI270  
 ARI271  
 ARI272  
 ARI273  
 ARI274  
 ARI275  
 ARI276  
 ARI277  
 ARI278  
 ARI279  
 ARI280  
 ARI281  
 ARI282  
 ARI283  
 ARI284  
 ARI285  
 ARI286  
 ARI287  
 ARI288  
 ARI289  
 ARI290  
 ARI291  
 ARI292  
 ARI293  
 ARI294  
 ARI295  
 ARI296  
 ARI297  
 ARI298  
 ARI299  
 ARI300  
 ARI301  
 ARI302  
 ARI303  
 ARI304  
 ARI305  
 ARI306  
 ARI307  
 ARI308  
 ARI309  
 ARI310  
 ARI311  
 ARI312  
 ARI313  
 ARI314  
 ARI315  
 ARI316  
 ARI317  
 ARI318  
 ARI319  
 ARI320  
 ARI321  
 ARI322  
 ARI323  
 ARI324  
 ARI325  
 ARI326  
 ARI327  
 ARI328  
 ARI329  
 ARI330  
 ARI331  
 ARI332  
 ARI333  
 ARI334  
 ARI335  
 ARI336  
 ARI337  
 ARI338  
 ARI339  
 ARI340  
 ARI341  
 ARI342  
 ARI343  
 ARI344  
 ARI345  
 ARI346  
 ARI347  
 ARI348  
 ARI349  
 ARI350  
 ARI351  
 ARI352  
 ARI353  
 ARI354  
 ARI355  
 ARI356  
 ARI357  
 ARI358  
 ARI359  
 ARI360  
 ARI361  
 ARI362  
 ARI363  
 ARI364  
 ARI365  
 ARI366  
 ARI367  
 ARI368  
 ARI369  
 ARI370  
 ARI371  
 ARI372  
 ARI373  
 ARI374  
 ARI375  
 ARI376  
 ARI377  
 ARI378  
 ARI379  
 ARI380  
 ARI381  
 ARI382  
 ARI383  
 ARI384  
 ARI385  
 ARI386  
 ARI387  
 ARI388  
 ARI389  
 ARI390  
 ARI391  
 ARI392  
 ARI393  
 ARI394  
 ARI395  
 ARI396  
 ARI397  
 ARI398  
 ARI399  
 ARI400  
 ARI401  
 ARI402  
 ARI403  
 ARI404  
 ARI405  
 ARI406  
 ARI407  
 ARI408  
 ARI409  
 ARI410  
 ARI411  
 ARI412  
 ARI413  
 ARI414  
 ARI415  
 ARI416  
 ARI417  
 ARI418  
 ARI419  
 ARI420  
 ARI421  
 ARI422  
 ARI423  
 ARI424  
 ARI425  
 ARI426  
 ARI427  
 ARI428  
 ARI429  
 ARI430  
 ARI431  
 ARI432  
 ARI433  
 ARI434  
 ARI435  
 ARI436  
 ARI437  
 ARI438  
 ARI439  
 ARI440  
 ARI441  
 ARI442  
 ARI443  
 ARI444  
 ARI445  
 ARI446  
 ARI447  
 ARI448  
 ARI449  
 ARI450  
 ARI451  
 ARI452  
 ARI453  
 ARI454  
 ARI455  
 ARI456  
 ARI457  
 ARI458  
 ARI459  
 ARI460  
 ARI461  
 ARI462  
 ARI463  
 ARI464  
 ARI465  
 ARI466  
 ARI467  
 ARI468  
 ARI469  
 ARI470  
 ARI471  
 ARI472  
 ARI473  
 ARI474  
 ARI475  
 ARI476  
 ARI477  
 ARI478  
 ARI479  
 ARI480  
 ARI481  
 ARI482  
 ARI483  
 ARI484  
 ARI485  
 ARI486  
 ARI487  
 ARI488  
 ARI489  
 ARI490  
 ARI491  
 ARI492  
 ARI493  
 ARI494  
 ARI495  
 ARI496  
 ARI497  
 ARI498  
 ARI499  
 ARI500  
 ARI501  
 ARI502  
 ARI503  
 ARI504  
 ARI505  
 ARI506  
 ARI507  
 ARI508  
 ARI509  
 ARI510  
 ARI511  
 ARI512  
 ARI513  
 ARI514  
 ARI515  
 ARI516  
 ARI517  
 ARI518  
 ARI519  
 ARI520  
 ARI521  
 ARI522  
 ARI523  
 ARI524  
 ARI525  
 ARI526  
 ARI527  
 ARI528  
 ARI529  
 ARI530  
 ARI531  
 ARI532  
 ARI533  
 ARI534  
 ARI535  
 ARI536  
 ARI537  
 ARI538  
 ARI539  
 ARI540  
 ARI541  
 ARI542  
 ARI543  
 ARI544  
 ARI545  
 ARI546  
 ARI547  
 ARI548  
 ARI549  
 ARI550  
 ARI551  
 ARI552  
 ARI553  
 ARI554  
 ARI555  
 ARI556  
 ARI557  
 ARI558  
 ARI559  
 ARI560  
 ARI561  
 ARI562  
 ARI563  
 ARI564  
 ARI565  
 ARI566  
 ARI567  
 ARI568  
 ARI569  
 ARI570  
 ARI571  
 ARI572  
 ARI573  
 ARI574  
 ARI575  
 ARI576  
 ARI577  
 ARI578  
 ARI579  
 ARI580  
 ARI581  
 ARI582  
 ARI583  
 ARI584  
 ARI585  
 ARI586  
 ARI587  
 ARI588  
 ARI589  
 ARI590  
 ARI591  
 ARI592  
 ARI593  
 ARI594  
 ARI595  
 ARI596  
 ARI597  
 ARI598  
 ARI599  
 ARI600  
 ARI601  
 ARI602  
 ARI603  
 ARI604  
 ARI605  
 ARI606  
 ARI607  
 ARI608  
 ARI609  
 ARI610  
 ARI611  
 ARI612  
 ARI613  
 ARI614  
 ARI615  
 ARI616  
 ARI617  
 ARI618  
 ARI619  
 ARI620  
 ARI621  
 ARI622  
 ARI623  
 ARI624  
 ARI625  
 ARI626  
 ARI627  
 ARI628  
 ARI629  
 ARI630  
 ARI631  
 ARI632  
 ARI633  
 ARI634  
 ARI635  
 ARI636  
 ARI637  
 ARI638  
 ARI639  
 ARI640  
 ARI641  
 ARI642  
 ARI643  
 ARI644  
 ARI645  
 ARI646  
 ARI647  
 ARI648  
 ARI649  
 ARI650  
 ARI651  
 ARI652  
 ARI653  
 ARI654  
 ARI655  
 ARI656  
 ARI657  
 ARI658  
 ARI659  
 ARI660  
 ARI661  
 ARI662  
 ARI663  
 ARI664  
 ARI665  
 ARI666  
 ARI667  
 ARI668  
 ARI669  
 ARI670  
 ARI671  
 ARI672  
 ARI673  
 ARI674  
 ARI675  
 ARI676  
 ARI677  
 ARI678  
 ARI679  
 ARI680  
 ARI681  
 ARI682  
 ARI683  
 ARI684  
 ARI685  
 ARI686  
 ARI687  
 ARI688  
 ARI689  
 ARI690  
 ARI691  
 ARI692  
 ARI693  
 ARI694  
 ARI695  
 ARI696  
 ARI697  
 ARI698  
 ARI699  
 ARI700  
 ARI701  
 ARI702  
 ARI703  
 ARI704  
 ARI705  
 ARI706  
 ARI707  
 ARI708  
 ARI709  
 ARI710  
 ARI711  
 ARI712  
 ARI713  
 ARI714  
 ARI715  
 ARI716  
 ARI717  
 ARI718  
 ARI719  
 ARI720  
 ARI721  
 ARI722  
 ARI723  
 ARI724  
 ARI725  
 ARI726  
 ARI727  
 ARI728  
 ARI729  
 ARI730  
 ARI731  
 ARI732  
 ARI733  
 ARI734  
 ARI735  
 ARI736  
 ARI737  
 ARI738  
 ARI739  
 ARI740  
 ARI741  
 ARI742  
 ARI743  
 ARI744  
 ARI745  
 ARI746  
 ARI747  
 ARI748  
 ARI749  
 ARI750  
 ARI751  
 ARI752  
 ARI753  
 ARI754  
 ARI755  
 ARI756  
 ARI757  
 ARI758  
 ARI759  
 ARI760  
 ARI761  
 ARI762  
 ARI763  
 ARI764  
 ARI765  
 ARI766  
 ARI767  
 ARI768  
 ARI769  
 ARI770  
 ARI771  
 ARI772  
 ARI773  
 ARI774  
 ARI775  
 ARI776  
 ARI777  
 ARI778  
 ARI779  
 ARI780  
 ARI781  
 ARI782  
 ARI783  
 ARI784  
 ARI785  
 ARI786  
 ARI787  
 ARI788  
 ARI789  
 ARI790  
 ARI791  
 ARI792  
 ARI793  
 ARI794  
 ARI795  
 ARI796  
 ARI797  
 ARI798  
 ARI799  
 ARI800  
 ARI801  
 ARI802  
 ARI803  
 ARI804  
 ARI805  
 ARI806  
 ARI807  
 ARI808  
 ARI809  
 ARI810  
 ARI811  
 ARI812  
 ARI813  
 ARI814  
 ARI815  
 ARI816  
 ARI817  
 ARI818  
 ARI819  
 ARI820  
 ARI821  
 ARI822  
 ARI823  
 ARI824  
 ARI825  
 ARI826  
 ARI827  
 ARI828  
 ARI829  
 ARI830  
 ARI831  
 ARI832  
 ARI833  
 ARI834  
 ARI835  
 ARI836  
 ARI837  
 ARI838  
 ARI839  
 ARI840  
 ARI841  
 ARI842  
 ARI843  
 ARI844  
 ARI845  
 ARI846  
 ARI847  
 ARI848  
 ARI849  
 ARI850  
 ARI851  
 ARI852  
 ARI853  
 ARI854  
 ARI855  
 ARI856  
 ARI857  
 ARI858  
 ARI859  
 ARI860  
 ARI861  
 ARI862  
 ARI863  
 ARI864  
 ARI865  
 ARI866  
 ARI867  
 ARI868  
 ARI869  
 ARI870  
 ARI871  
 ARI872  
 ARI873  
 ARI874  
 ARI875  
 ARI876  
 ARI877  
 ARI878  
 ARI879  
 ARI880  
 ARI881  
 ARI882  
 ARI883  
 ARI884  
 ARI885  
 ARI886  
 ARI887  
 ARI888  
 ARI889  
 ARI890  
 ARI891  
 ARI892  
 ARI893  
 ARI894  
 ARI895  
 ARI896  
 ARI897  
 ARI898  
 ARI899  
 ARI900  
 ARI901  
 ARI902  
 ARI903  
 ARI904  
 ARI905  
 ARI906  
 ARI907  
 ARI908  
 ARI909  
 ARI910  
 ARI911  
 ARI912  
 ARI913  
 ARI914  
 ARI915  
 ARI916  
 ARI917  
 ARI918  
 ARI919  
 ARI920  
 ARI921  
 ARI922  
 ARI923  
 ARI924  
 ARI925  
 ARI926  
 ARI927  
 ARI928  
 ARI929  
 ARI930  
 ARI931  
 ARI932  
 ARI933  
 ARI934  
 ARI935  
 ARI936  
 ARI937  
 ARI938  
 ARI939  
 ARI940  
 ARI941  
 ARI942  
 ARI943  
 ARI944  
 ARI945  
 ARI946  
 ARI947  
 ARI948  
 ARI949  
 ARI950  
 ARI951  
 ARI952  
 ARI953  
 ARI954  
 ARI955  
 ARI956  
 ARI957  
 ARI958  
 ARI959  
 ARI960  
 ARI961  
 ARI962  
 ARI963  
 ARI964  
 ARI965  
 ARI966  
 ARI967  
 ARI968  
 ARI969  
 ARI970  
 ARI971  
 ARI972  
 ARI973  
 ARI974  
 ARI975  
 ARI976  
 ARI977  
 ARI978  
 ARI979  
 ARI980  
 ARI981  
 ARI982  
 ARI983  
 ARI984  
 ARI985  
 ARI986  
 ARI987  
 ARI988  
 ARI989  
 ARI990  
 ARI991  
 ARI992  
 ARI993  
 ARI994  
 ARI995  
 ARI996  
 ARI997  
 ARI998  
 ARI999  
 ARI1000
